# Supplementary material for: Cage fusion from bi-cages to tri-cages during nucleation of methane hydrate: a DFT-D simulation
Source: Royal Society of Chemistry journal article supplement (doi:10.1039/c8cp07207h), 2019-01-01
Supplement: c8cp07207h1.pdf [file c8cp07207h1.pdf]

## Supporting Information

### **Cage Fusion from Bi-Cage to Tri-Cage during Nucleation of Methane Hydrate: DFT-D simulation**

Keyao Li<sup>1</sup>, Ruili Shi<sup>1</sup>, Lingli Tang<sup>2</sup>, Yingying Huang<sup>1</sup>, Xiaoxiao Cao<sup>3</sup>, Yan Su<sup>1\*</sup>

<sup>1</sup>*Key Laboratory of Materials Modification by Laser, Ion and Electron Beams (Dalian University of Technology), Ministry of Education, Dalian 116024, China*

<sup>2</sup>*School of Science, Dalian Nationalities University, Dalian 116600, P.R. China*

<sup>3</sup>*College of Physics and Electronic Engineering, Jiangsu Second Normal University, Nanjing 210013, China*

---

\*E-mail: su.yan@dlut.edu.cn

**Table SI.** The bond length of CH<sub>4</sub> in mono-cage.

| Cage | Atom |    | Bond length (Å) | Average bond length (Å) |
|------|------|----|-----------------|-------------------------|
| 18   | C    | H1 | 1.091           | 1.092                   |
|      | C    | H2 | 1.092           |                         |
|      | C    | H3 | 1.092           |                         |
|      | C    | H4 | 1.093           |                         |
| 20   | C    | H1 | 1.093           | 1.094                   |
|      | C    | H2 | 1.094           |                         |
|      | C    | H3 | 1.094           |                         |
|      | C    | H4 | 1.094           |                         |
| 22   | C    | H1 | 1.095           | 1.095                   |
|      | C    | H2 | 1.095           |                         |
|      | C    | H3 | 1.095           |                         |
|      | C    | H4 | 1.095           |                         |
| 24   | C    | H1 | 1.096           | 1.097                   |
|      | C    | H2 | 1.097           |                         |
|      | C    | H3 | 1.097           |                         |
|      | C    | H4 | 1.097           |                         |
